# Supplementary material for: The Differential Prognostic Impact of Long-Duration Atrial High-Rate Episodes Detected by Cardiac Implantable Electronic Devices between Patients with and without a History of Atrial Fibrillation
Source: MDPI journal article supplement (doi:10.3390/jcm11061732), 2022-03-21
Supplement: s1 [file s1]

# Supplementary Materials

**Table S1.** Characteristics of patients who developed MACE in the group without a history of AF.

| Patient No. | Age (years) | Sex | AHRE duration | Type of CIEDs | The first MACE |      | All-cause death |                | HFH |              | Stroke |
|-------------|-------------|-----|---------------|---------------|----------------|------|-----------------|----------------|-----|--------------|--------|
|             |             |     |               |               | Type           | Year | Y/N             | Cause of death | Y/N | Multiple HFH | Y/N    |
| 1           | 54          | M   | ≥24 h         | CRTD          | HFH            | 3.7  | Y               | HF             | Y   | N            | N      |
| 2           | 67          | M   | ≥24 h         | ICD           | HFH            | 8.4  | N               |                | Y   | N            | N      |
| 3           | 60          | M   | ≥24 h         | CRTD          | HFH            | 3.4  | Y               | HF             | Y   | Y            | N      |
| 4           | 81          | F   | ≥24 h         | CRTP          | HFH            | 8.2  | N               |                | Y   | N            | N      |
| 5           | 52          | M   | ≥24 h         | ICD           | HFH            | 1.9  | N               |                | Y   | Y            | N      |
| 6           | 61          | M   | ≥24 h         | ICD           | HFH            | 5.5  | N               |                | Y   | N            | N      |
| 7           | 64          | F   | ≥24 h         | CRTD          | HFH            | 5.9  | N               |                | Y   | N            | N      |
| 8           | 85          | M   | ≥24 h         | PM            | death          | 8.8  | Y               | pneumonia      | N   | -            | N      |
| 9           | 80          | M   | ≥24 h         | PM            | death          | 8.0  | Y               | sudden death   | N   | -            | N      |
| 10          | 69          | M   | ≥24 h         | ICD           | death          | 9.5  | Y               | sudden death   | N   | -            | N      |
| 11          | 74          | M   | ≥24 h         | PM            | stroke         | 2.4  | N               |                | N   | -            | Y      |
| 12          | 45          | M   | ≥24 h         | ICD           | HFH            | 2.7  | N               |                | Y   | N            | N      |
| 13          | 57          | M   | ≥24 h         | ICD           | HFH            | 6.9  | N               |                | Y   | N            | N      |
| 14          | 73          | M   | ≥24 h         | ICD           | HFH            | 0.9  | N               |                | Y   | Y            | N      |
| 15          | 84          | F   | ≥24 h         | PM            | HFH            | 2.9  | N               |                | Y   | N            | N      |
| 16          | 75          | M   | ≥24 h         | ICD           | HFH            | 1.4  | Y               | HF             | Y   | Y            | N      |
| 17          | 85          | M   | <24 h         | PM            | HFH            | 6.1  | Y               | pneumonia      | Y   | N            | N      |
| 18          | 82          | M   | <24 h         | PM            | death          | 3.2  | Y               | pneumonia      | N   | -            | N      |
| 19          | 62          | M   | <24 h         | CRTD          | death          | 2.3  | Y               | pneumonia      | N   | -            | N      |
| 20          | 54          | M   | <24 h         | ICD           | death          | 7.0  | Y               | sudden death   | N   | -            | N      |
| 21          | 100         | M   | <24 h         | PM            | death          | 1.0  | Y               | senility       | N   | -            | N      |

|    |    |   |       |      |        |     |   |              |   |   |   |
|----|----|---|-------|------|--------|-----|---|--------------|---|---|---|
| 22 | 76 | M | <24 h | ICD  | stroke | 2.0 | N |              | N | - | Y |
| 23 | 65 | M | <24 h | CRTD | death  | 1.6 | Y | sudden death | N | - | N |
| 24 | 85 | F | <24 h | PM   | death  | 0.9 | Y | GI bleeding  | N | - | N |

---

AF, atrial fibrillation; AHRE, atrial high rate episodes; CIEDs, cardiac implantable electronic devices; CRTD, cardiac resynchronization therapy with defibrillator; CRTP, cardiac resynchronization therapy with pacemaker; F, female; GI, gastrointestinal; HF, heart failure; HFH, heart failure hospitalization; ICD, implantable cardioverter defibrillator; M, male; MACE, major adverse cardiovascular events; N, no; PM, pacemaker; Y, yes
